# Supplementary material for: Superior stretchable, low thermal resistance and efficient self-healing composite elastomers for thermal management
Source: Royal Society of Chemistry journal article supplement (doi:10.1039/d2ta05781f), 2022-01-01
Supplement: d2ta05781f1.pdf [file d2ta05781f1.pdf]

## Supporting Information

### **Superior Stretchable, low thermal resistance and efficient self-healing composite elastomers for thermal management**

Zhengyu Wang<sup>a,b</sup>, JianFeng Fan<sup>a</sup>, Dongyi He<sup>a</sup>, Linlin Ren<sup>a\*</sup>, Zhifeng Hao<sup>c\*</sup>, Rong Sun<sup>a</sup>, and Xiaoliang Zeng<sup>a\*</sup>

<sup>a</sup> Shenzhen Institute of Advanced Electronic Materials, Shenzhen Institute of Advanced Technology, Chinese Academy of Sciences, Shenzhen 518055, China. E-mail: xl.zeng@siat.ac.cn, ll.ren@siat.ac.cn.

<sup>b</sup> Shenzhen College of Advanced Technology, University of Chinese Academy of Sciences, Beijing 101408, China

<sup>c</sup> School of Chemical Engineering and Light Industry, Guangdong University of Technology, Guangzhou 510006, China. E-mail: [haozf@gdut.edu.cn](mailto:haozf@gdut.edu.cn).

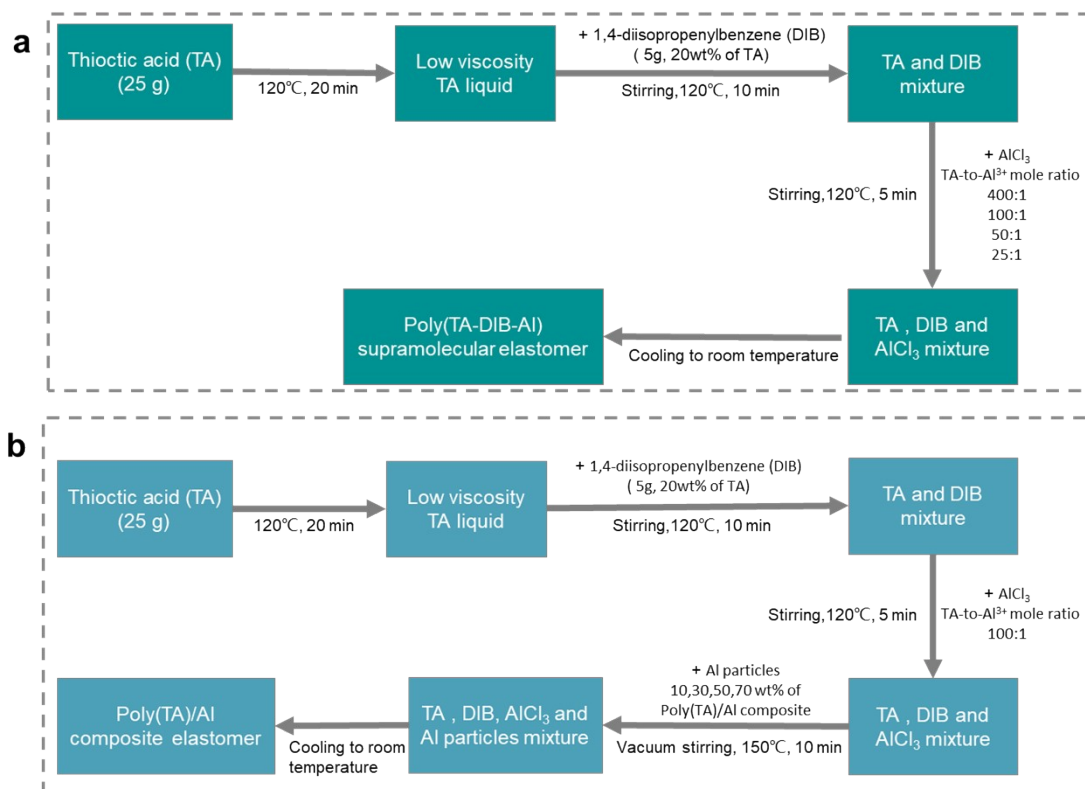

**Figure S1.** The preparation flow chart of (a) Poly(TA-DIB-Al) supramolecular elastomer and (b) Poly(TA)/Al composite elastomer.

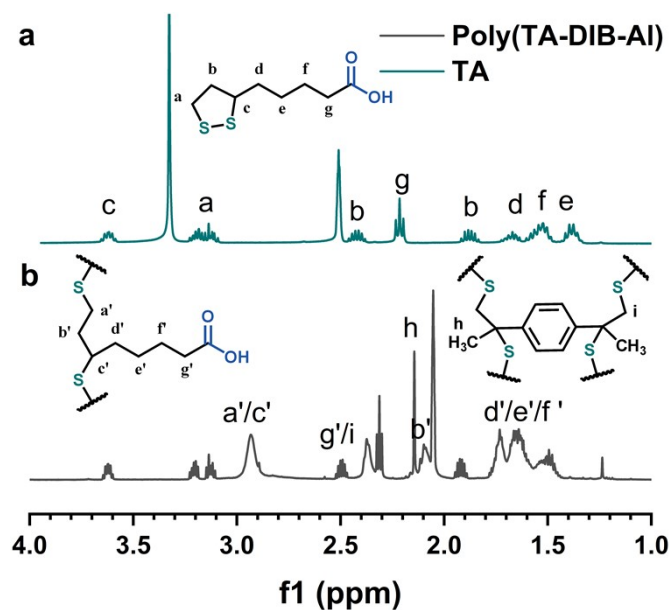

**Figure S2. NMR analysis.** (a) Partial  $^1\text{H}$  NMR spectra of TA monomer and (b) Poly(TA-DIB-Al) supramolecular elastomer (TA-to- $\text{Al}^{3+}$  molar ratio of 100:1; 20 wt% DIB).

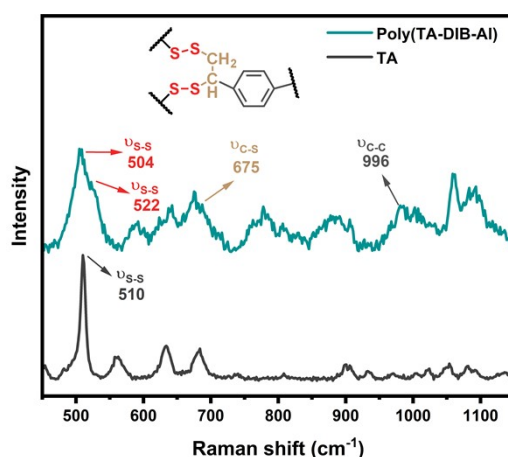

**Figure S3.** Raman spectrum of the Poly(TA-DIB-Al) supramolecular elastomer. (TA-to-Al<sup>3+</sup> molar ratio of 100:1; 20 wt% DIB).

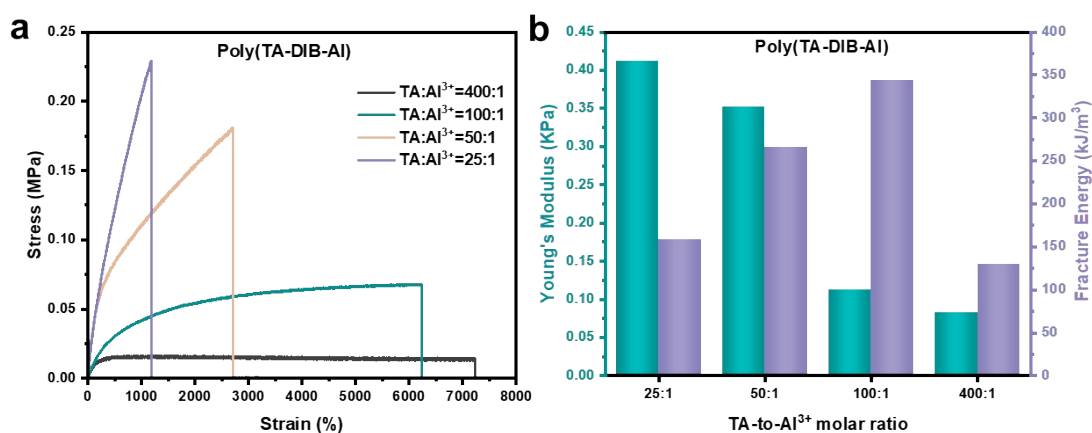

**Figure S4.** Mechanical properties of Poly(TA-DIB-Al) supramolecular elastomer. (a) Stress-strain curves of the elastomer with different Al<sup>3+</sup> concentrations. (b) Young's modulus and fracture energy versus different Al<sup>3+</sup> concentrations.

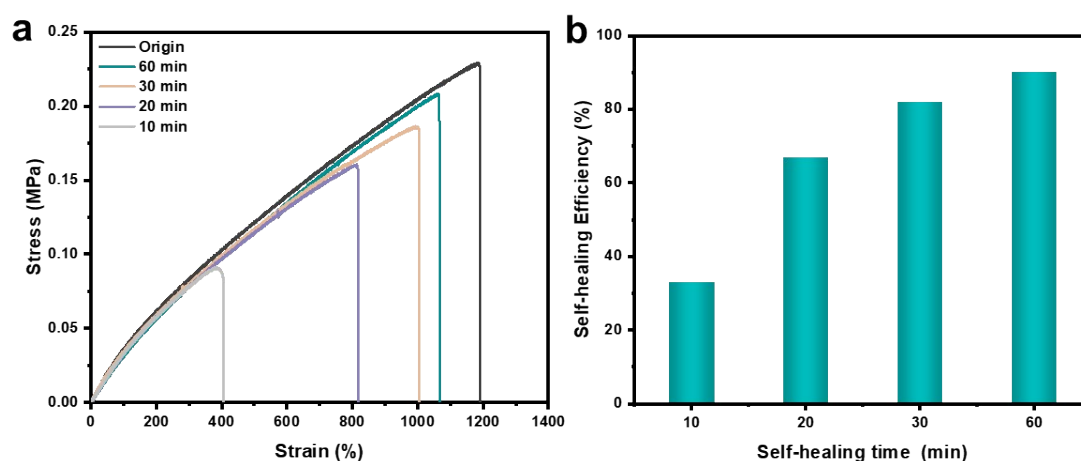

**Figure S5.** Stress-strain curves of the Poly(TA-DIB-Al) supramolecular elastomer air (TA-to-Al<sup>3+</sup> molar ratio of 25:1; 20 wt% DIB) healed for different time periods at room temperature. Stretching ability increases when the film is allowed to heal for a longer time.

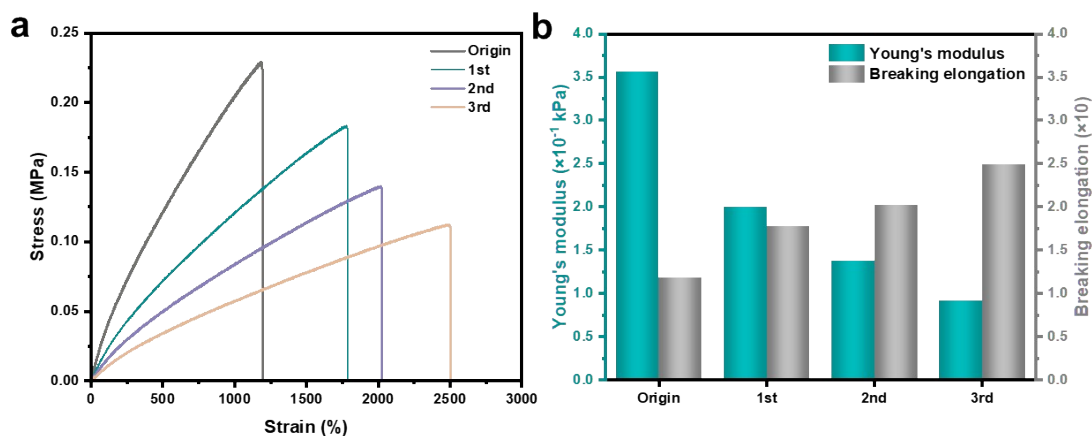

**Figure S6.** (a) Stress–strain curves and (b) mechanical properties of the recycled Poly(TA-DIB-Al) supramolecular elastomers during three cycles (TA-to-Al<sup>3+</sup> molar ratio of 25:1; 20 wt% DIB).

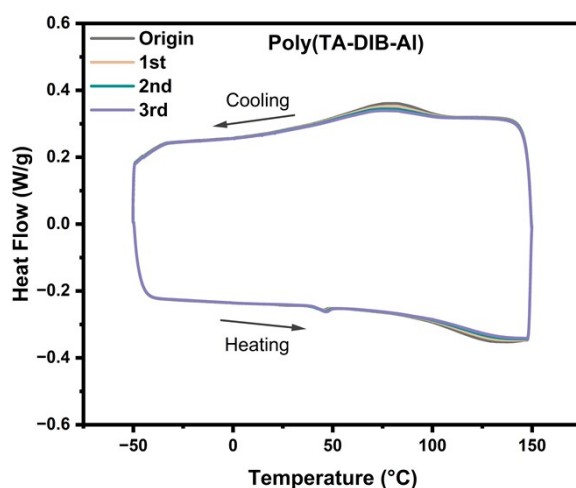

**Figure S7.** DSC curves of the (a) TA monomer, (b) original and recycled Poly(TA-DIB-Al) elastomers (TA-to-Al<sup>3+</sup> molar ratio of 25:1; 20 wt% DIB).

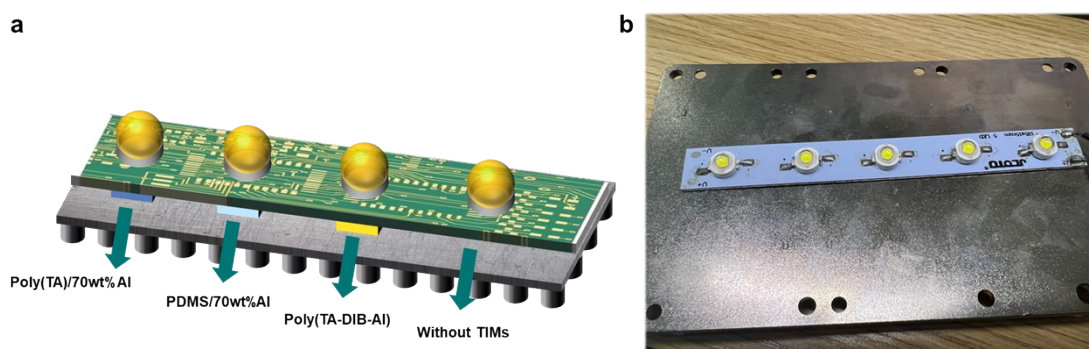

**Figure S8.** Thermal management application of Poly(TA)/70wt%Al, PDMS/70wt%Al and Poly(TA-DIB-Al) supramolecular elastomers (TA-to-Al<sup>3+</sup> molar ratio of 100:1; 20 wt% DIB) in LED lamps. (a) An illustration and (b) a photo of experimental configuration for heat dissipation of LED lamps.
